# Supplementary material
Source: publisher site journal article supplement (https://www.jstage.jst.go.jp/article/geochemj/48/1/48_2.0279/_supplement/_download/48_2.0279_1.pdf)
Supplement: Supplementary file 1 [file 48_2.0279_1.pdf]

Supplementary Table S1.  $\delta^2\text{H}$  and  $\delta^{18}\text{O}$  values in precipitation, precipitation amounts, and averaged air temperatures in each sampling month at Rokkasho station.

| Rokkasho station |        |        |                        |                           | Rokkasho station |        |        |                        |                           |
|------------------|--------|--------|------------------------|---------------------------|------------------|--------|--------|------------------------|---------------------------|
| Sampling month   | P (mm) | T (°C) | $\delta^2\text{H}$ (‰) | $\delta^{18}\text{O}$ (‰) | Sampling month   | P (mm) | T (°C) | $\delta^2\text{H}$ (‰) | $\delta^{18}\text{O}$ (‰) |
| Nov. 2000        | 101    | 6.3    | -53.4                  | -9.5                      | May 2003         | 31     | 11.2   | -40.7                  | -6.3                      |
| Dec. 2000        | 88     | 0.5    |                        |                           | Jun. 2003        | 182    | 14.4   | -69.0                  | -9.7                      |
| Jan. 2001        | 111    | -2.7   |                        |                           | Jul. 2003        | 172    | 15.1   | -49.2                  | -7.1                      |
| Feb. 2001        | 22     | -2.2   | -42.0                  | -8.5                      | Aug. 2003        | 200    | 19.4   | -49.6                  | -7.1                      |
| Mar. 2001        | 57     | 1.8    | -59.2                  | -9.9                      | Sep. 2003        | 154    | 18.0   | -46.7                  | -7.1                      |
| Apr. 2001        | 17     | 8.1    | -55.9                  | -8.7                      | Oct. 2003        | 49     | 12.9   | -35.4                  | -6.6                      |
| May 2001         | 119    | 10.9   | -59.4                  | -8.8                      | Nov. 2003        | 85     | 8.4    | -49.5                  | -9.2                      |
| Jun. 2001        | 140    | 15.1   | -64.8                  | -9.3                      | Dec. 2003        | 95     | 3.4    | -52.4                  | -9.8                      |
| Jul. 2001        | 241    | 19.1   | -59.3                  | -8.5                      | Jan. 2004        | 101    | -0.2   | -63.1                  | -11.0                     |
| Aug. 2001        | 166    | 19.0   | -29.4                  | -4.4                      | Feb. 2004        | 77     | 0.8    | -54.5                  | -9.8                      |
| Sep. 2004        | 318    | 17.7   | -59.2                  | -8.8                      | Mar. 2004        | 31     | 2.6    | -52.0                  | -9.2                      |
| Oct. 2004        | 186    | 13.5   | -61.4                  | -9.5                      | Apr. 2004        | 89     | 7.3    | -61.6                  | -9.4                      |
| Nov. 2004        | 75     | 7.1    | -46.6                  | -8.9                      | May 2004         | 148    | 12.4   | -68.2                  | -9.6                      |
| Dec. 2004        | 67     | -0.8   | -47.6                  | -8.7                      | Jun. 2004        | 73     | 17.0   | -58.1                  | -8.3                      |
| Jan. 2002        | 77     | 0.0    | -72.5                  | -11.4                     | Jul. 2004        | 228    | 20.6   | -61.4                  | -8.9                      |
| Feb. 2002        | 32     | 0.9    | -53.1                  | -9.6                      | Aug. 2004        | 116    | 21.9   | -38.7                  | -6.3                      |
| Mar. 2002        | 71     | 3.9    | -77.0                  | -11.4                     | Sep. 2004        | 295    | 18.9   | -55.8                  | -8.6                      |
| Apr. 2002        | 21     | 9.4    | -44.4                  | -6.2                      | Oct. 2004        | 81     | 13.4   | -53.5                  | -8.5                      |
| May 2002         | 136    | 11.9   | -62.8                  | -9.2                      | Nov. 2004        | 124    | 9.3    | -36.1                  | -6.8                      |
| Jun. 2002        | 95     | 14.7   | -50.3                  | -7.3                      | Dec. 2004        | 177    | 2.4    | -68.4                  | -11.2                     |
| Jul. 2002        | 252    | 19.0   | -73.1                  | -10.2                     | Jan. 2005        | 133    | -0.8   | -58.2                  | -10.4                     |
| Aug. 2002        | 312    | 20.0   | -65.4                  | -9.6                      | Feb. 2005        | 124    | -2.0   | -58.1                  | -9.8                      |
| Sep. 2002        | 103    | 18.4   | -45.9                  | -7.5                      | Mar. 2005        | 136    | 1.3    | -54.5                  | -9.6                      |
| Oct. 2002        | 187    | 13.3   | -45.7                  | -7.7                      | Apr. 2005        | 67     | 7.8    | -32.5                  | -5.9                      |
| Nov. 2002        | 131    | 4.3    | -58.8                  | -10.2                     | May 2005         | 102    | 10.0   | -45.1                  | -7.1                      |
| Dec. 2002        | 51     | 0.0    | -34.1                  | -7.1                      | Jun. 2005        | 48     | 15.2   | -48.8                  | -6.7                      |
| Jan. 2003        | 85     | -1.2   | -46.6                  | -8.4                      | Jul. 2005        | 295    | 17.9   | -47.9                  | -7.2                      |
| Feb. 2003        | 45     | -0.7   | -46.2                  | -8.6                      | Aug. 2005        | 70     | 23.0   | -53.3                  | -7.9                      |
| Mar. 2003        | 65     | 1.8    | -84.3                  | -11.5                     | Sep. 2005        | 201    | 19.6   | -44.2                  | -7.3                      |
| Apr. 2003        | 93     | 8.0    | -51.0                  | -7.7                      | Oct. 2005        | 117    | 14.4   | -34.5                  | -6.2                      |

Supplementary Table S1.  $\delta^2\text{H}$  and  $\delta^{18}\text{O}$  values in precipitation, precipitation amounts, and averaged air temperatures in each sampling month at Rokkasho station.

| Rokkasho station |        |        |                        |                           | Rokkasho station |        |        |                        |                           |
|------------------|--------|--------|------------------------|---------------------------|------------------|--------|--------|------------------------|---------------------------|
| Sampling month   | P (mm) | T (°C) | $\delta^2\text{H}$ (‰) | $\delta^{18}\text{O}$ (‰) | Sampling month   | P (mm) | T (°C) | $\delta^2\text{H}$ (‰) | $\delta^{18}\text{O}$ (‰) |
| Nov. 2005        | 161    | 7.3    | -47.3                  | -9.4                      | May 2008         | 63     | 11.5   | -58.0                  | -8.7                      |
| Dec. 2005        | 116    | -0.1   | -47.7                  | -9.6                      | Jun. 2008        | 205    | 14.7   | -57.9                  | -8.5                      |
| Jan. 2006        | 70     | -1.7   | -49.2                  | -9.6                      | Jul. 2008        | 178    | 19.6   | -53.2                  | -8.2                      |
| Feb. 2006        | 63     | -0.9   | -62.2                  | -10.3                     | Aug. 2008        | 222    | 20.5   | -46.8                  | -7.8                      |
| Mar. 2006        | 81     | 2.4    | -65.4                  | -10.2                     | Sep. 2008        | 11     | 19.1   | -44.6                  | -7.1                      |
| Apr. 2006        | 128    | 5.5    | -58.2                  | -9.2                      | Oct. 2008        | 67     | 14.3   | -48.1                  | -9.3                      |
| May 2006         | 73     | 12.0   | -54.5                  | -8.1                      | Nov. 2008        | 74     | 7.2    | -57.2                  | -10.8                     |
| Jun. 2006        | 51     | 14.1   | -64.2                  | -8.6                      | Dec. 2008        | 94     | 3.1    | -52.1                  | -10.0                     |
| Jul. 2006        | 163    | 17.7   | -46.1                  | -6.5                      | Jan. 2009        | 109    | 0.6    | -75.1                  | -12.5                     |
| Aug. 2006        | 48     | 22.7   | -51.9                  | -7.3                      | Feb. 2009        | 90     | 0.3    | -50.9                  | -8.7                      |
| Sep. 2006        | 168    | 19.2   | -61.5                  | -9.8                      | Mar. 2009        | 41     | 2.7    | -52.3                  | -8.3                      |
| Oct. 2006        | 214    | 13.4   | -91.1                  | -13.7                     | Apr. 2009        | 154    | 8.1    | -66.6                  | -9.8                      |
| Nov. 2006        | 181    | 8.1    | -47.8                  | -9.4                      | May 2009         | 95     | 12.9   | -48.7                  | -6.9                      |
| Dec. 2006        | 155    | 2.2    | -70.8                  | -12.0                     | Jun. 2009        | 153    | 14.6   | -54.4                  | -7.4                      |
| Jan. 2007        | 152    | 1.2    | -79.8                  | -12.7                     | Jul. 2009        | 292    | 18.8   | -70.0                  | -9.6                      |
| Feb. 2007        | 62     | 1.5    | -60.8                  | -10.4                     | Aug. 2009        | 104    | 20.3   | -75.0                  | -10.1                     |
| Mar. 2007        | 76     | 2.2    | -58.9                  | -10.4                     | Sep. 2009        | 112    | 18.3   | -24.7                  | -4.4                      |
| Apr. 2007        | 114    | 7.0    | -51.0                  | -9.1                      | Oct. 2009        | 95     | 13.9   | -64.9                  | -9.3                      |
| May 2007         | 66     | 12.3   | -48.3                  | -7.9                      | Nov. 2009        | 103    | 7.5    | -35.5                  | -6.7                      |
| Jun. 2007        | 76     | 17.3   | -51.0                  | -7.3                      | Dec. 2009        | 99     | 1.9    | -46.3                  | -9.1                      |
| Jul. 2007        | 106    | 17.9   | -55.4                  | -7.9                      | Jan. 2010        | 129    | -0.4   | -54.3                  | -9.6                      |
| Aug. 2007        | 101    | 23.4   | -22.7                  | -4.0                      | Feb. 2010        | 67     | -1.0   | -45.4                  | -9.4                      |
| Sep. 2007        | 207    | 20.2   | -45.1                  | -7.3                      | Mar. 2010        | 92     | 1.5    | -83.6                  | -12.2                     |
| Oct. 2007        | 34     | 13.7   | -15.4                  | -4.4                      | Apr. 2010        | 56     | 6.0    | -50.4                  | -7.8                      |
| Nov. 2007        | 241    | 6.7    | -68.9                  | -11.7                     | May 2010         | 202    | 10.6   | -66.8                  | -9.6                      |
| Dec. 2007        | 149    | 1.9    | -52.2                  | -9.9                      | Jun. 2010        | 91     | 16.3   | -76.4                  | -10.7                     |
| Jan. 2008        | 77     | -1.7   | -47.0                  | -9.3                      | Jul. 2010        | 214    | 21.4   | -76.8                  | -10.9                     |
| Feb. 2008        | 25     | -1.0   | -47.2                  | -8.5                      | Aug. 2010        | 77     | 24.6   | -66.5                  | -9.5                      |
| Mar. 2008        | 41     | 3.9    | -40.9                  | -6.8                      | Sep. 2010        | 174    | 20.5   | -47.6                  | -7.5                      |
| Apr. 2008        | 51     | 7.7    | -48.2                  | -7.5                      | Oct. 2010        | 143    | 14.5   | -43.0                  | -6.6                      |

Supplementary Table S1.  $\delta^2\text{H}$  and  $\delta^{18}\text{O}$  values in precipitation, precipitation amounts, and averaged air temperatures in each sampling month at Rokkasho station.

| Rokkasho station |        |                          |                        |                           |
|------------------|--------|--------------------------|------------------------|---------------------------|
| Sampling month   | P (mm) | T ( $^{\circ}\text{C}$ ) | $\delta^2\text{H}$ (‰) | $\delta^{18}\text{O}$ (‰) |
| Nov. 2010        | 108    | 7.7                      | -47.0                  | -9.0                      |
| Dec. 2010        | 200    | 3.3                      | -62.1                  | -10.9                     |
| Jan. 2011        | 82     | -2.2                     | -56.2                  | -10.5                     |
| Feb. 2011        | 25     | 0.6                      | -48.7                  | -8.8                      |
| Mar. 2011        | 59     | 1.3                      | -65.8                  | -11.1                     |
| Apr. 2011        | 74     | 7.4                      | -54.4                  | -8.2                      |
| May 2011         | 100    | 11.0                     | -59.2                  | -8.5                      |
| Jun. 2011        | 71     | 16.5                     | -69.0                  | -9.6                      |
| Jul. 2011        | 29     | 20.7                     | -34.1                  | -4.4                      |
| Aug. 2011        | 162    | 22.7                     | -53.1                  | -7.6                      |
| Sep. 2011        | 361    | 19.5                     | -77.2                  | -11.2                     |
| Oct. 2011        | 82     | 13.5                     | -56.0                  | -9.1                      |
| Nov. 2011        | 96     | 8.1                      | -46.6                  | -8.6                      |
| Dec. 2011        | 204    | 0.3                      | -57.2                  | -10.5                     |

Supplementary Table S1.  $\delta^2\text{H}$  and  $\delta^{18}\text{O}$  values in precipitation, precipitation amounts, and averaged air temperatures in each sampling month at Ajigasawa station and Hakkoda station.

| Ajigasawa station |        |        |                        |                           | Hakkoda station |        |        |                        |                           |
|-------------------|--------|--------|------------------------|---------------------------|-----------------|--------|--------|------------------------|---------------------------|
| Sampling month    | P (mm) | T (°C) | $\delta^2\text{H}$ (‰) | $\delta^{18}\text{O}$ (‰) | Sampling month  | P (mm) | T (°C) | $\delta^2\text{H}$ (‰) | $\delta^{18}\text{O}$ (‰) |
| Nov. 2003         | 133    | 8.3    | -34.1                  | -7.2                      | Nov. 2003       | 141    | 2.8    | -48.9                  | -9.2                      |
| Dec. 2003         | 151    | 3.9    | -60.7                  | -10.9                     | Dec. 2003       | 123    | -3.1   | -58.0                  | -11.1                     |
| Jan. 2004         | 124    | 0.2    | -57.8                  | -10.8                     | Jan. 2004       | 131    | -6.8   | -59.6                  | -11.5                     |
| Feb. 2004         | 109    | 1.4    | -40.3                  | -7.4                      | Feb. 2004       | 201    | -5.5   | -49.3                  | -9.7                      |
| Mar. 2004         | 41     | 3.2    | -59.9                  | -10.0                     | Mar. 2004       | 91     | -3.6   | -35.2                  | -7.9                      |
| Apr. 2004         | 134    | 8.1    | -53.6                  | -8.3                      | Apr. 2004       | 163    | 2.3    | -61.5                  | -9.5                      |
| May 2004          | 108    | 14.3   | -61.0                  | -8.7                      | May 2004        | 368    | 10.5   | -90.0                  | -12.8                     |
| Jun. 2004         | 63     | 18.1   | -55.1                  | -7.8                      | Jun. 2004       | 61     | 14.8   | -65.5                  | -10.1                     |
| Jul. 2004         | 65     | 22.4   | -42.3                  | -6.2                      | Jul. 2004       | 53     | 18.8   | -61.1                  | -9.3                      |
| Aug. 2004         | 111    | 22.7   | -38.7                  | -6.3                      | Aug. 2004       | 37     | 17.6   | -45.5                  | -7.5                      |
| Sep. 2004         | 258    | 19.1   | -64.0                  | -9.7                      | Sep. 2004       | 31     | 14.5   | -66.3                  | -10.2                     |
| Oct. 2004         | 23     | 13.6   | -58.9                  | -9.4                      | Oct. 2004       | 22     | 7.8    | -61.2                  | -11.0                     |
| Nov. 2004         | 157    | 10.4   | -40.4                  | -7.2                      | Nov. 2004       | 22     | 3.9    | -74.7                  | -12.3                     |
| Dec. 2004         | 188    | 3.4    | -59.2                  | -10.5                     | Dec. 2004       | 161    | -3.7   | -83.2                  | -14.0                     |
| Jan. 2005         | 193    | -0.1   | -46.6                  | -9.2                      | Jan. 2005       | 132    | -7.1   | -67.1                  | -12.2                     |
| Feb. 2005         | 117    | -1.6   | -51.7                  | -9.5                      | Feb. 2005       | 55     | -8.6   | -71.5                  | -12.8                     |
| Mar. 2005         | 114    | 1.9    | -45.9                  | -8.3                      | Mar. 2005       | 183    | -4.7   | -61.3                  | -11.0                     |
| Apr. 2005         | 74     | 8.4    | -25.0                  | -4.5                      | Apr. 2005       | 344    | 2.1    | -36.0                  | -6.9                      |
| May 2005          | 52     | 11.7   | -42.8                  | -6.5                      | May 2005        | 139    | 6.6    | -55.3                  | -7.8                      |
| Jun. 2005         | 70     | 18.4   | -70.2                  | -10.1                     | Jun. 2005       | 91     | 15.0   | -70.8                  | -9.4                      |
| Jul. 2005         | 216    | 19.9   | -61.6                  | -8.9                      | Jul. 2005       | 483    | 16.1   | -71.6                  | -10.0                     |
| Aug. 2005         | 146    | 24.4   | -64.0                  | -9.3                      | Aug. 2005       | 779    | 19.8   | -72.4                  | -10.8                     |
| Sep. 2005         | 135    | 19.1   | -47.8                  | -7.5                      | Sep. 2005       | 306    | 14.1   | -66.6                  | -10.4                     |
| Oct. 2005         | 119    | 14.1   | -38.9                  | -6.7                      | Oct. 2005       | 295    | 8.7    | -52.9                  | -9.3                      |
| Nov. 2005         | 177    | 8.2    | -48.8                  | -9.0                      | Nov. 2005       | 141    | 0.9    | -56.5                  | -10.9                     |
| Dec. 2005         | 122    | -0.3   | -57.9                  | -10.3                     | Dec. 2005       | 90     | -7.3   | -53.3                  | -11.0                     |
| Jan. 2006         | 67.4   | -1.2   | -52.1                  | -9.4                      | Jan. 2006       | 111    | -8.5   | -51.9                  | -10.9                     |
| Feb. 2006         | 65.1   | -0.4   | -66.5                  | -10.5                     | Feb. 2006       | 160    | -6.8   | -55.2                  | -10.1                     |
| Mar. 2006         | 48.0   | 2.5    | -53.0                  | -8.6                      | Mar. 2006       | 85     | -3.7   | -64.4                  | -10.9                     |
